# Supplementary material for: The Size-Dependent Effects of Silver Nanoparticles on Germination, Early Seedling Development and Polar Metabolite Profile of Wheat (Triticum aestivum L.)
Source: MDPI journal article supplement (doi:10.3390/ijms232113255), 2022-10-31
Supplement: s1 [file s1]

## Supplementary materials

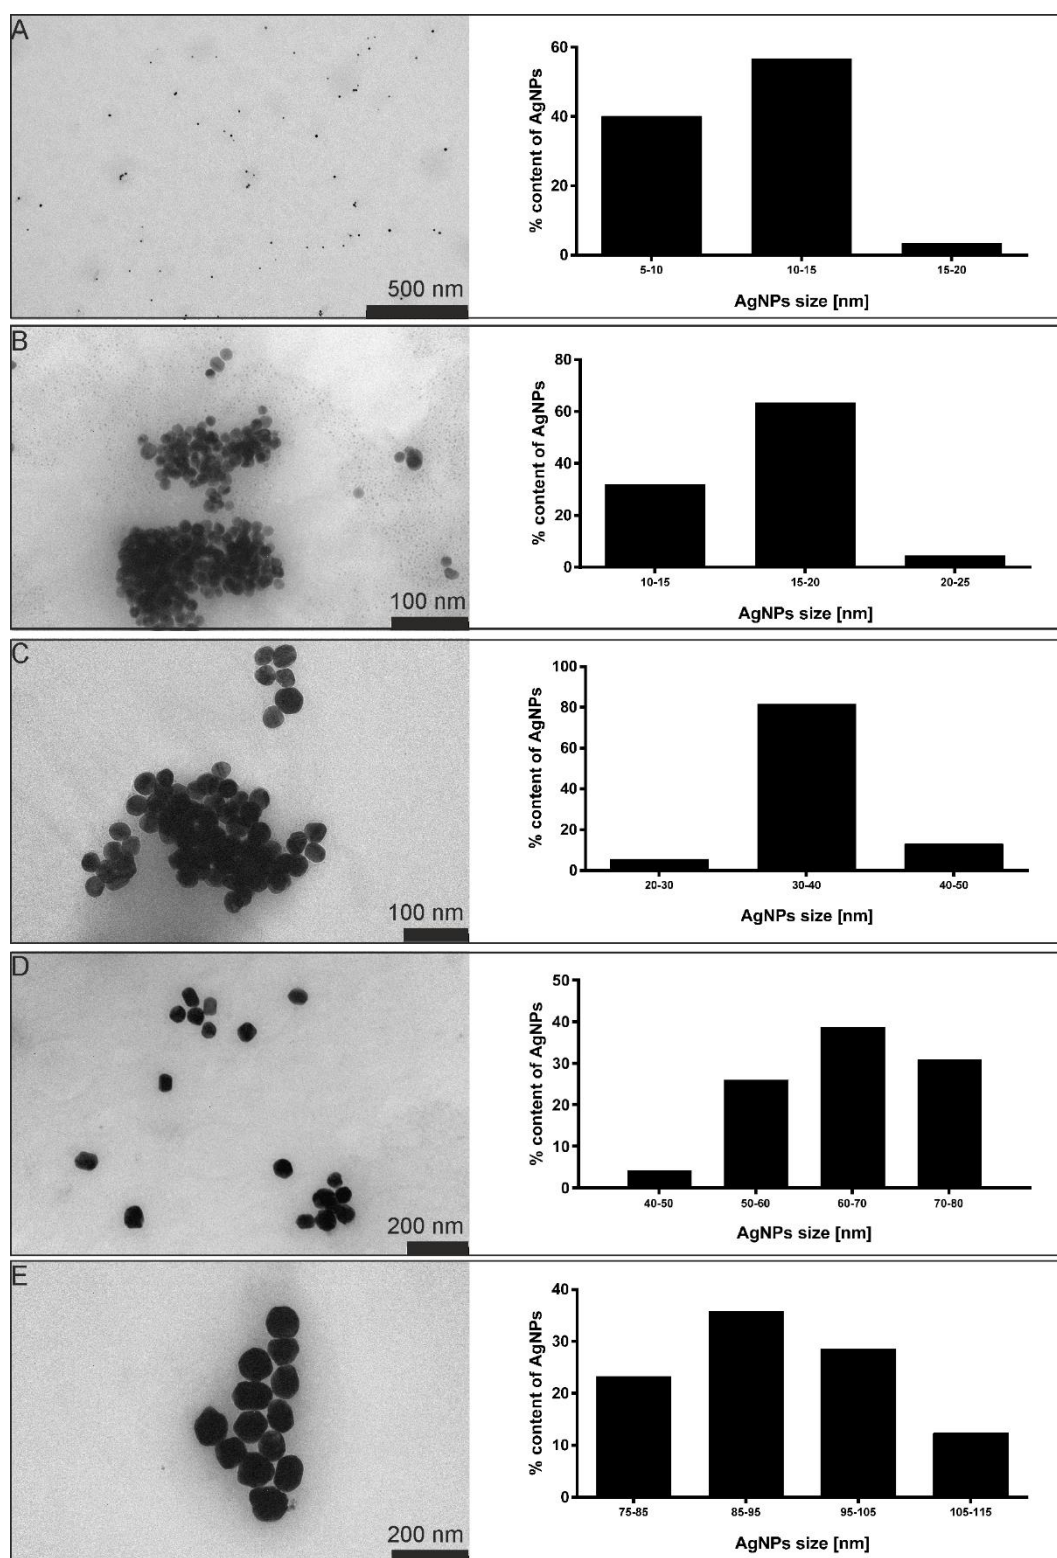

**Figure S1.** The size distribution of Ag NPs declared as 10, 20, 40, 60 and 100 nm (A, B, C, D, and E).

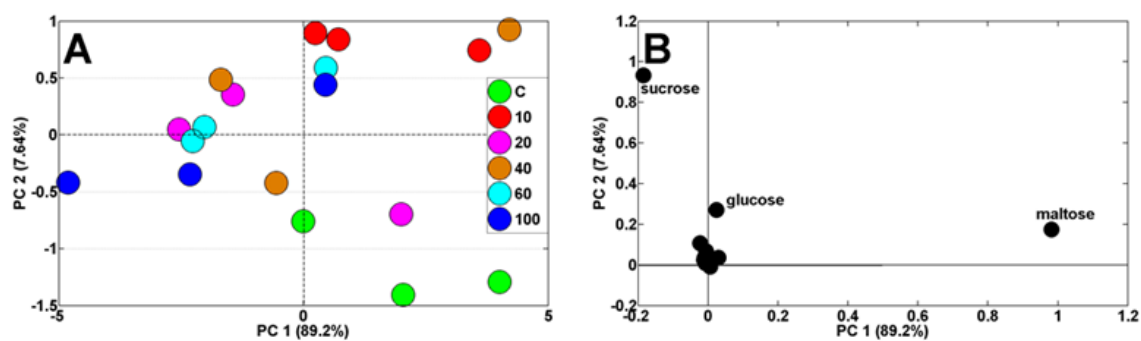

**Figure S2.** (A) PCA profiles of endosperm metabolites of wheat seedlings developing in double distilled water (control, C) and in the presence of citrate-stabilized Ag NPs with the size of 10, 20, 40, 60 and 100 nm (at the concentration of 20 mg/L each) and (B) PCA loading plots of the polar metabolites.

**Table S1.** The concentrations of polar metabolites, including total identified polar metabolites (TIPMs), total soluble carbohydrates (TSCs), total amino acids (TAAs), total organic acids (TOAs), and total remaining compounds (TRCs) in roots of 3-day-old seedling of wheat (*Triticum aestivum* L., cv. ‘Ostka Strzelecka’) developing in dd water (control) or in 20 mg/L Ag NPs with a different size (10, 20, 40, 60 and 100 nm). Means of 3 replicates. The same letters by the values indicate no statistically significant differences ( $P < 0.05$ ) based on ANOVA analysis and Tukey’s post- hoc corrections.

| Roots             | Control<br>(H <sub>2</sub> O) | Ag NPs, size, nm    |                     |                      |                     |                     |
|-------------------|-------------------------------|---------------------|---------------------|----------------------|---------------------|---------------------|
|                   |                               | 10                  | 20                  | 40                   | 60                  | 100                 |
| Metabolites       |                               | mg/g DW             |                     |                      |                     |                     |
| TIPMs, including: | 107.70 <sup>a</sup>           | 102.09 <sup>a</sup> | 100.63 <sup>a</sup> | 103.23 <sup>a</sup>  | 112.82 <sup>a</sup> | 106.09 <sup>a</sup> |
| TSCs, including:  | 45.17 <sup>a</sup>            | 38.36 <sup>a</sup>  | 37.08 <sup>a</sup>  | 40.68 <sup>a</sup>   | 46.65 <sup>a</sup>  | 44.17 <sup>a</sup>  |
| fructose          | 10.78 <sup>a</sup>            | 5.27 <sup>bc</sup>  | 4.67 <sup>c</sup>   | 5.13 <sup>c</sup>    | 7.73 <sup>abc</sup> | 8.24 <sup>ab</sup>  |
| glucose           | 13.52 <sup>abc</sup>          | 8.23 <sup>c</sup>   | 8.88 <sup>c</sup>   | 11.17 <sup>bc</sup>  | 17.26 <sup>a</sup>  | 16.31 <sup>ab</sup> |
| galactose         | 5.00 <sup>abc</sup>           | 3.80 <sup>d</sup>   | 4.57 <sup>cd</sup>  | 6.16 <sup>a</sup>    | 5.84 <sup>ab</sup>  | 5.73 <sup>ab</sup>  |
| myo-inositol      | 0.30 <sup>a</sup>             | 0.26 <sup>a</sup>   | 0.24 <sup>a</sup>   | 0.27 <sup>a</sup>    | 0.29 <sup>a</sup>   | 0.26 <sup>a</sup>   |
| sucrose           | 9.46 <sup>abc</sup>           | 13.33 <sup>a</sup>  | 11.37 <sup>ab</sup> | 10.54 <sup>abc</sup> | 8.39 <sup>bc</sup>  | 6.20 <sup>c</sup>   |
| maltose           | 1.54 <sup>a</sup>             | 1.46 <sup>a</sup>   | 1.85 <sup>a</sup>   | 1.43 <sup>a</sup>    | 2.03 <sup>a</sup>   | 1.88 <sup>a</sup>   |
| 1-kestose         | 4.57 <sup>b</sup>             | 6.00 <sup>a</sup>   | 5.49 <sup>ab</sup>  | 5.98 <sup>a</sup>    | 5.11 <sup>ab</sup>  | 5.54 <sup>a</sup>   |
| TAAs, including:  | 35.61 <sup>a</sup>            | 36.71 <sup>a</sup>  | 36.88 <sup>a</sup>  | 37.61 <sup>a</sup>   | 37.68 <sup>a</sup>  | 36.44 <sup>a</sup>  |
| alanine           | 0.80 <sup>a</sup>             | 0.79 <sup>a</sup>   | 0.82 <sup>a</sup>   | 0.74 <sup>a</sup>    | 0.63 <sup>a</sup>   | 0.75 <sup>a</sup>   |
| asparagine        | 8.63 <sup>a</sup>             | 10.16 <sup>a</sup>  | 9.97 <sup>a</sup>   | 8.65 <sup>a</sup>    | 8.94 <sup>a</sup>   | 8.83 <sup>a</sup>   |
| aspartic acid     | 0.15 <sup>b</sup>             | 0.49 <sup>ab</sup>  | 0.37 <sup>ab</sup>  | 0.33 <sup>ab</sup>   | 0.56 <sup>a</sup>   | 0.35 <sup>ab</sup>  |
| GABA              | 0.46 <sup>a</sup>             | 0.42 <sup>a</sup>   | 0.46 <sup>a</sup>   | 0.38 <sup>a</sup>    | 0.43 <sup>a</sup>   | 0.44 <sup>a</sup>   |
| glutamic acid     | 1.13 <sup>a</sup>             | 1.08 <sup>a</sup>   | 1.09 <sup>a</sup>   | 0.95 <sup>a</sup>    | 0.89 <sup>a</sup>   | 0.96 <sup>a</sup>   |
| glutamine         | 11.27 <sup>a</sup>            | 11.98 <sup>a</sup>  | 12.68 <sup>a</sup>  | 14.08 <sup>a</sup>   | 12.71 <sup>a</sup>  | 12.42 <sup>a</sup>  |
| glycine           | 0.52 <sup>a</sup>             | 0.47 <sup>ab</sup>  | 0.46 <sup>ab</sup>  | 0.44 <sup>b</sup>    | 0.43 <sup>b</sup>   | 0.43 <sup>b</sup>   |
| hydroxyproline    | 4.86 <sup>a</sup>             | 3.77 <sup>b</sup>   | 3.52 <sup>b</sup>   | 3.91 <sup>ab</sup>   | 3.77 <sup>b</sup>   | 4.24 <sup>ab</sup>  |
| isoleucine        | 1.14 <sup>a</sup>             | 1.21 <sup>a</sup>   | 1.23 <sup>a</sup>   | 1.26 <sup>a</sup>    | 1.31 <sup>a</sup>   | 1.23 <sup>a</sup>   |
| leucine           | 0.86 <sup>a</sup>             | 0.86 <sup>a</sup>   | 0.83 <sup>a</sup>   | 1.01 <sup>a</sup>    | 1.04 <sup>a</sup>   | 0.89 <sup>a</sup>   |
| lysine            | 0.42 <sup>a</sup>             | 0.38 <sup>a</sup>   | 0.33 <sup>a</sup>   | 0.41 <sup>a</sup>    | 0.91 <sup>a</sup>   | 0.44 <sup>a</sup>   |
| methionine        | 0.04 <sup>a</sup>             | 0.04 <sup>a</sup>   | 0.04 <sup>a</sup>   | 0.05 <sup>a</sup>    | 0.07 <sup>a</sup>   | 0.04 <sup>a</sup>   |
| phenylalanine     | 0.28 <sup>a</sup>             | 0.21 <sup>a</sup>   | 0.23 <sup>a</sup>   | 0.23 <sup>a</sup>    | 0.26 <sup>a</sup>   | 0.24 <sup>a</sup>   |
| proline           | 1.70 <sup>ab</sup>            | 1.59 <sup>ab</sup>  | 1.52 <sup>b</sup>   | 1.88 <sup>ab</sup>   | 2.07 <sup>a</sup>   | 1.66 <sup>ab</sup>  |
| serine            | 0.99 <sup>a</sup>             | 0.98 <sup>a</sup>   | 0.97 <sup>a</sup>   | 0.94 <sup>a</sup>    | 1.01 <sup>a</sup>   | 0.93 <sup>a</sup>   |
| threonine         | 0.46 <sup>a</sup>             | 0.50 <sup>a</sup>   | 0.48 <sup>a</sup>   | 0.43 <sup>a</sup>    | 0.44 <sup>a</sup>   | 0.46 <sup>a</sup>   |
| tryptophan        | 0.11 <sup>a</sup>             | 0.09 <sup>a</sup>   | 0.09 <sup>a</sup>   | 0.06 <sup>a</sup>    | 0.10 <sup>a</sup>   | 0.10 <sup>a</sup>   |
| tyrosine          | 0.43 <sup>ab</sup>            | 0.23 <sup>b</sup>   | 0.30 <sup>ab</sup>  | 0.32 <sup>ab</sup>   | 0.48 <sup>ab</sup>  | 0.50 <sup>a</sup>   |
| valine            | 1.36 <sup>b</sup>             | 1.48 <sup>ab</sup>  | 1.50 <sup>ab</sup>  | 1.54 <sup>ab</sup>   | 1.62 <sup>a</sup>   | 1.52 <sup>ab</sup>  |
| TOAs, including:  | 19.70 <sup>a</sup>            | 19.62 <sup>a</sup>  | 19.33 <sup>a</sup>  | 18.20 <sup>a</sup>   | 21.35 <sup>a</sup>  | 18.75 <sup>a</sup>  |
| citric acid       | 5.76 <sup>a</sup>             | 5.00 <sup>a</sup>   | 5.11 <sup>a</sup>   | 5.19 <sup>a</sup>    | 6.73 <sup>a</sup>   | 6.30 <sup>a</sup>   |
| fumaric acid      | 0.12 <sup>a</sup>             | 0.18 <sup>a</sup>   | 0.15 <sup>a</sup>   | 0.11 <sup>a</sup>    | 0.17 <sup>a</sup>   | 0.15 <sup>a</sup>   |
| malic acid        | 11.88 <sup>ab</sup>           | 13.35 <sup>a</sup>  | 13.13 <sup>ab</sup> | 11.80 <sup>ab</sup>  | 13.06 <sup>ab</sup> | 11.37 <sup>b</sup>  |
| lactic acid       | 1.48 <sup>a</sup>             | 0.54 <sup>b</sup>   | 0.47 <sup>b</sup>   | 0.67 <sup>b</sup>    | 0.55 <sup>b</sup>   | 0.45 <sup>b</sup>   |
| oxalic acid       | 0.42 <sup>a</sup>             | 0.46 <sup>a</sup>   | 0.43 <sup>a</sup>   | 0.38 <sup>a</sup>    | 0.62 <sup>a</sup>   | 0.41 <sup>a</sup>   |
| propionic acid    | 0.04 <sup>a</sup>             | 0.09 <sup>a</sup>   | 0.05 <sup>a</sup>   | 0.05 <sup>a</sup>    | 0.22 <sup>a</sup>   | 0.07 <sup>a</sup>   |
| TRCs, including:  | 7.22 <sup>a</sup>             | 7.39 <sup>a</sup>   | 7.34 <sup>a</sup>   | 6.72 <sup>a</sup>    | 7.13 <sup>a</sup>   | 6.73 <sup>a</sup>   |
| phosphoric acid   | 6.96 <sup>a</sup>             | 7.30 <sup>a</sup>   | 7.27 <sup>a</sup>   | 6.63 <sup>a</sup>    | 7.04 <sup>a</sup>   | 6.64 <sup>a</sup>   |
| urea              | 0.26 <sup>a</sup>             | 0.09 <sup>b</sup>   | 0.08 <sup>b</sup>   | 0.09 <sup>b</sup>    | 0.09 <sup>b</sup>   | 0.09 <sup>b</sup>   |

**Table S2.** The concentrations of polar metabolites, including total identified polar metabolites (TIPMs), total soluble carbohydrates (TSCs), total amino acids (TAAs), total organic acids (TOAs), and total remaining compounds (TRCs) in coleoptile of 3-day-old seedling of wheat (*Triticum aestivum* L., cv. ‘Ostka Strzelecka’) developing in dd water (control) or in 20 mg/L Ag NPs with a different size (20, 40, 60 and 100 nm). Means of 3 replicates. The same letters by the values indicate no statistically significant differences ( $P < 0.05$ ) based on ANOVA analysis and Tukey’s post- hoc corrections.

| Coleoptile        | Control<br>(H <sub>2</sub> O) | Ag NPs, size, nm     |                      |                      |                     |                     |
|-------------------|-------------------------------|----------------------|----------------------|----------------------|---------------------|---------------------|
|                   |                               | 10                   | 20                   | 40                   | 60                  | 100                 |
| Metabolites       |                               | mg/g DW              |                      |                      |                     |                     |
| TIPMs, including: | 129.69 <sup>ab</sup>          | 119.41 <sup>bc</sup> | 118.32 <sup>bc</sup> | 118.36 <sup>bc</sup> | 138.08 <sup>a</sup> | 111.19 <sup>c</sup> |
| TSCs, including:  | 94.58 <sup>ab</sup>           | 93.52 <sup>bc</sup>  | 84.26 <sup>bc</sup>  | 88.05 <sup>bc</sup>  | 100.55 <sup>a</sup> | 80.60 <sup>c</sup>  |
| fructose          | 39.11 <sup>a</sup>            | 35.05 <sup>ab</sup>  | 29.04 <sup>b</sup>   | 30.45 <sup>b</sup>   | 34.85 <sup>ab</sup> | 28.98 <sup>b</sup>  |
| glucose           | 36.65 <sup>ab</sup>           | 31.49 <sup>bc</sup>  | 26.85 <sup>c</sup>   | 32.59 <sup>bc</sup>  | 41.56 <sup>a</sup>  | 32.21 <sup>bc</sup> |
| galactose         | 4.37 <sup>a</sup>             | 4.75 <sup>a</sup>    | 4.93 <sup>a</sup>    | 4.53 <sup>a</sup>    | 5.50 <sup>a</sup>   | 4.79 <sup>a</sup>   |
| myo-inositol      | 1.69 <sup>ab</sup>            | 1.78 <sup>ab</sup>   | 1.69 <sup>ab</sup>   | 1.65 <sup>ab</sup>   | 1.97 <sup>a</sup>   | 1.63 <sup>b</sup>   |
| sucrose           | 6.36 <sup>bc</sup>            | 4.69 <sup>c</sup>    | 13.98 <sup>a</sup>   | 11.64 <sup>a</sup>   | 9.93 <sup>ab</sup>  | 6.85 <sup>bc</sup>  |
| maltose           | 1.12 <sup>ab</sup>            | 1.07 <sup>b</sup>    | 1.66 <sup>a</sup>    | 0.73 <sup>b</sup>    | 0.84 <sup>b</sup>   | 0.87 <sup>b</sup>   |
| 1-kestose         | 5.28 <sup>a</sup>             | 5.72 <sup>a</sup>    | 6.11 <sup>a</sup>    | 6.46 <sup>a</sup>    | 5.90 <sup>a</sup>   | 5.27 <sup>a</sup>   |
| TAAs, including:  | 17.16 <sup>a</sup>            | 16.31 <sup>a</sup>   | 16.09 <sup>a</sup>   | 15.17 <sup>a</sup>   | 18.38 <sup>a</sup>  | 14.22 <sup>a</sup>  |
| alanine           | 1.09 <sup>a</sup>             | 0.90 <sup>a</sup>    | 0.83 <sup>a</sup>    | 0.97 <sup>a</sup>    | 1.01 <sup>a</sup>   | 0.87 <sup>a</sup>   |
| asparagine        | 2.58 <sup>ab</sup>            | 2.34 <sup>ab</sup>   | 2.22 <sup>b</sup>    | 2.35 <sup>ab</sup>   | 3.19 <sup>a</sup>   | 2.43 <sup>ab</sup>  |
| aspartic acid     | 0.31 <sup>ab</sup>            | 0.27 <sup>b</sup>    | 0.28 <sup>ab</sup>   | 0.33 <sup>ab</sup>   | 0.39 <sup>a</sup>   | 0.35 <sup>ab</sup>  |
| GABA              | 1.80 <sup>ab</sup>            | 1.67 <sup>ab</sup>   | 1.62 <sup>ab</sup>   | 1.51 <sup>b</sup>    | 1.94 <sup>a</sup>   | 1.61 <sup>ab</sup>  |
| glutamic acid     | 0.66 <sup>a</sup>             | 0.75 <sup>a</sup>    | 0.70 <sup>a</sup>    | 0.66 <sup>a</sup>    | 0.58 <sup>a</sup>   | 0.51 <sup>a</sup>   |
| glutamine         | 2.98 <sup>ab</sup>            | 3.22 <sup>a</sup>    | 3.73 <sup>a</sup>    | 2.83 <sup>ab</sup>   | 3.22 <sup>a</sup>   | 1.12 <sup>b</sup>   |
| glycine           | 0.79 <sup>ab</sup>            | 0.80 <sup>a</sup>    | 0.80 <sup>a</sup>    | 0.68 <sup>ab</sup>   | 0.80 <sup>a</sup>   | 0.65 <sup>b</sup>   |
| hydroxyproline    | 1.84 <sup>a</sup>             | 1.84 <sup>a</sup>    | 1.57 <sup>a</sup>    | 1.49 <sup>a</sup>    | 1.93 <sup>a</sup>   | 1.71 <sup>a</sup>   |
| isoleucine        | 0.19 <sup>ab</sup>            | 0.20 <sup>ab</sup>   | 0.19 <sup>ab</sup>   | 0.18 <sup>b</sup>    | 0.23 <sup>a</sup>   | 0.19 <sup>b</sup>   |
| leucine           | 0.08 <sup>a</sup>             | 0.08 <sup>a</sup>    | 0.10 <sup>a</sup>    | 0.08 <sup>a</sup>    | 0.11 <sup>a</sup>   | 0.08 <sup>a</sup>   |
| lysine            | 1.30 <sup>a</sup>             | 1.19 <sup>a</sup>    | 0.86 <sup>a</sup>    | 0.78 <sup>a</sup>    | 1.05 <sup>a</sup>   | 1.73 <sup>a</sup>   |
| methionine        | 0.04 <sup>a</sup>             | 0.04 <sup>a</sup>    | 0.04 <sup>a</sup>    | 0.03 <sup>a</sup>    | 0.03 <sup>a</sup>   | 0.03 <sup>a</sup>   |
| phenylalanine     | 0.17 <sup>a</sup>             | 0.16 <sup>a</sup>    | 0.16 <sup>a</sup>    | 0.14 <sup>a</sup>    | 0.19 <sup>a</sup>   | 0.12 <sup>a</sup>   |
| proline           | 1.02 <sup>abc</sup>           | 0.82 <sup>c</sup>    | 1.03 <sup>abc</sup>  | 1.53 <sup>ab</sup>   | 1.58 <sup>a</sup>   | 0.98 <sup>bc</sup>  |
| serine            | 0.65 <sup>ab</sup>            | 0.62 <sup>ab</sup>   | 0.63 <sup>ab</sup>   | 0.53 <sup>b</sup>    | 0.70 <sup>a</sup>   | 0.57 <sup>ab</sup>  |
| threonine         | 0.14 <sup>b</sup>             | 0.15 <sup>ab</sup>   | 0.16 <sup>ab</sup>   | 0.14 <sup>b</sup>    | 0.19 <sup>a</sup>   | 0.13 <sup>b</sup>   |
| tryptophan        | 0.05 <sup>ab</sup>            | 0.04 <sup>ab</sup>   | 0.06 <sup>a</sup>    | 0.05 <sup>ab</sup>   | 0.05 <sup>ab</sup>  | 0.02 <sup>b</sup>   |
| tyrosine          | 1.10 <sup>a</sup>             | 0.85 <sup>ab</sup>   | 0.72 <sup>ab</sup>   | 0.52 <sup>b</sup>    | 0.71 <sup>ab</sup>  | 0.76 <sup>ab</sup>  |
| valine            | 0.39 <sup>ab</sup>            | 0.37 <sup>b</sup>    | 0.38 <sup>ab</sup>   | 0.39 <sup>ab</sup>   | 0.49 <sup>a</sup>   | 0.36 <sup>b</sup>   |
| TOAs, including:  | 9.09 <sup>ab</sup>            | 9.42 <sup>ab</sup>   | 9.13 <sup>ab</sup>   | 7.76 <sup>b</sup>    | 10.21 <sup>a</sup>  | 8.55 <sup>ab</sup>  |
| citric acid       | 4.60 <sup>a</sup>             | 5.03 <sup>a</sup>    | 4.96 <sup>a</sup>    | 3.93 <sup>a</sup>    | 5.43 <sup>a</sup>   | 4.58 <sup>a</sup>   |
| fumaric acid      | 0.36 <sup>ab</sup>            | 0.40 <sup>a</sup>    | 0.38 <sup>b</sup>    | 0.27 <sup>b</sup>    | 0.40 <sup>b</sup>   | 0.31 <sup>ab</sup>  |
| malic acid        | 2.32 <sup>ab</sup>            | 2.70 <sup>a</sup>    | 2.46 <sup>ab</sup>   | 1.87 <sup>c</sup>    | 2.18 <sup>bc</sup>  | 2.18 <sup>bc</sup>  |
| lactic acid       | 0.86 <sup>a</sup>             | 0.57 <sup>a</sup>    | 0.64 <sup>a</sup>    | 0.70 <sup>a</sup>    | 1.07 <sup>a</sup>   | 0.57 <sup>a</sup>   |
| oxalic acid       | 0.77 <sup>a</sup>             | 0.53 <sup>a</sup>    | 0.53 <sup>a</sup>    | 0.81 <sup>a</sup>    | 0.91 <sup>a</sup>   | 0.74 <sup>a</sup>   |
| propionic acid    | 0.18 <sup>a</sup>             | 0.19 <sup>a</sup>    | 0.17 <sup>a</sup>    | 0.17 <sup>a</sup>    | 0.22 <sup>a</sup>   | 0.18 <sup>a</sup>   |
| TRCs, including:  | 8.86 <sup>a</sup>             | 9.13 <sup>a</sup>    | 8.85 <sup>a</sup>    | 7.37 <sup>b</sup>    | 8.94 <sup>a</sup>   | 7.82 <sup>ab</sup>  |
| phosphoric acid   | 8.71 <sup>ab</sup>            | 9.01 <sup>a</sup>    | 8.74 <sup>a</sup>    | 7.24 <sup>b</sup>    | 8.80 <sup>a</sup>   | 7.72 <sup>ab</sup>  |
| urea              | 0.16 <sup>a</sup>             | 0.12 <sup>a</sup>    | 0.10 <sup>a</sup>    | 0.13 <sup>a</sup>    | 0.14 <sup>a</sup>   | 0.10 <sup>a</sup>   |

**Table S3.** The concentrations of polar metabolites, including total identified polar metabolites (TIPMs), total soluble carbohydrates (TSCs), total amino acids (TAAs), total organic acids (TOAs), and total remaining compounds (TRCs) in endosperm of 3-day-old seedling of wheat (*Triticum aestivum* L., cv. ‘Ostka Strzelecka’) developing in dd water (control) or in 20 mg/L Ag NPs with a different size (20, 40, 60 and 100 nm). Means of 3 replicates. The same letters by the values indicate no statistically significant differences ( $P < 0.05$ ) based on ANOVA analysis and Tukey’s post- hoc corrections.

| Endosperm         | Control            | Ag NPs size, nm     |                     |                     |                    |                     |
|-------------------|--------------------|---------------------|---------------------|---------------------|--------------------|---------------------|
|                   | (H <sub>2</sub> O) | 10                  | 20                  | 40                  | 60                 | 100                 |
| Metabolite        |                    | mg/g DW             |                     |                     |                    |                     |
| TIPMs, including: | 56.08 <sup>a</sup> | 59.64 <sup>a</sup>  | 56.02 <sup>a</sup>  | 58.03 <sup>a</sup>  | 56.40 <sup>a</sup> | 55.27 <sup>a</sup>  |
| TSCs, including:  | 51.30 <sup>a</sup> | 54.09 <sup>a</sup>  | 50.69 <sup>a</sup>  | 52.49 <sup>a</sup>  | 50.76 <sup>a</sup> | 49.68 <sup>a</sup>  |
| fructose          | 0.17 <sup>b</sup>  | 0.26 <sup>a</sup>   | 0.20 <sup>ab</sup>  | 0.20 <sup>ab</sup>  | 0.21 <sup>ab</sup> | 0.22 <sup>ab</sup>  |
| glucose           | 3.75 <sup>b</sup>  | 4.77 <sup>a</sup>   | 3.97 <sup>ab</sup>  | 4.33 <sup>ab</sup>  | 3.77 <sup>a</sup>  | 4.21 <sup>ab</sup>  |
| galactose         | 0.47 <sup>ab</sup> | 0.50 <sup>ab</sup>  | 0.51 <sup>ab</sup>  | 0.38 <sup>b</sup>   | 0.62 <sup>a</sup>  | 0.52 <sup>ab</sup>  |
| myo-inositol      | 0.19 <sup>a</sup>  | 0.21 <sup>a</sup>   | 0.21 <sup>a</sup>   | 0.19 <sup>a</sup>   | 0.21 <sup>a</sup>  | 0.21 <sup>a</sup>   |
| sucrose           | 10.65 <sup>b</sup> | 12.48 <sup>a</sup>  | 12.14 <sup>ab</sup> | 12.23 <sup>ab</sup> | 12.59 <sup>a</sup> | 12.34 <sup>ab</sup> |
| maltose           | 31.83 <sup>a</sup> | 31.65 <sup>a</sup>  | 29.39 <sup>a</sup>  | 30.74 <sup>a</sup>  | 28.86 <sup>a</sup> | 27.83 <sup>a</sup>  |
| maltotriose       | 1.54 <sup>a</sup>  | 1.54 <sup>a</sup>   | 1.40 <sup>a</sup>   | 1.57 <sup>a</sup>   | 1.52 <sup>a</sup>  | 1.55 <sup>a</sup>   |
| 1-kestose         | 2.69 <sup>a</sup>  | 2.70 <sup>a</sup>   | 2.88 <sup>a</sup>   | 2.84 <sup>a</sup>   | 2.98 <sup>a</sup>  | 2.80 <sup>a</sup>   |
| TAAAs, including: | 3.00 <sup>b</sup>  | 3.60 <sup>a</sup>   | 3.46 <sup>ab</sup>  | 3.62 <sup>a</sup>   | 3.74 <sup>a</sup>  | 3.73 <sup>a</sup>   |
| alanine           | 0.13 <sup>bc</sup> | 0.15 <sup>abc</sup> | 0.15 <sup>a</sup>   | 0.14 <sup>abc</sup> | 0.12 <sup>c</sup>  | 0.13 <sup>c</sup>   |
| asparagine        | 0.05 <sup>a</sup>  | 0.06 <sup>a</sup>   | 0.06 <sup>a</sup>   | 0.07 <sup>a</sup>   | 0.07 <sup>a</sup>  | 0.06 <sup>a</sup>   |
| aspartic acid     | 0.01 <sup>a</sup>  | 0.01 <sup>a</sup>   | 0.01 <sup>a</sup>   | 0.01 <sup>a</sup>   | 0.01 <sup>a</sup>  | 0.01 <sup>a</sup>   |
| GABA              | 0.09 <sup>a</sup>  | 0.12 <sup>a</sup>   | 0.13 <sup>a</sup>   | 0.08 <sup>a</sup>   | 0.09 <sup>a</sup>  | 0.10 <sup>a</sup>   |
| glutamic acid     | 0.14 <sup>c</sup>  | 0.14 <sup>c</sup>   | 0.15 <sup>bc</sup>  | 0.17 <sup>abc</sup> | 0.20 <sup>a</sup>  | 0.19 <sup>ab</sup>  |
| glutamine         | 0.21 <sup>b</sup>  | 0.26 <sup>ab</sup>  | 0.26 <sup>ab</sup>  | 0.29 <sup>ab</sup>  | 0.32 <sup>a</sup>  | 0.31 <sup>a</sup>   |
| glycine           | 0.11 <sup>b</sup>  | 0.14 <sup>a</sup>   | 0.13 <sup>ab</sup>  | 0.11 <sup>ab</sup>  | 0.12 <sup>ab</sup> | 0.12 <sup>ab</sup>  |
| hydroxyproline    | 0.31 <sup>b</sup>  | 0.39 <sup>ab</sup>  | 0.37 <sup>ab</sup>  | 0.42 <sup>a</sup>   | 0.39 <sup>ab</sup> | 0.40 <sup>ab</sup>  |
| isoleucine        | 0.13 <sup>b</sup>  | 0.15 <sup>a</sup>   | 0.15 <sup>a</sup>   | 0.15 <sup>a</sup>   | 0.15 <sup>a</sup>  | 0.15 <sup>a</sup>   |
| leucine           | 0.15 <sup>a</sup>  | 0.17 <sup>a</sup>   | 0.15 <sup>a</sup>   | 0.16 <sup>a</sup>   | 0.19 <sup>a</sup>  | 0.18 <sup>a</sup>   |
| lysine            | 0.16 <sup>a</sup>  | 0.19 <sup>a</sup>   | 0.19 <sup>a</sup>   | 0.20 <sup>a</sup>   | 0.22 <sup>a</sup>  | 0.23 <sup>a</sup>   |
| methionine        | 0.01 <sup>a</sup>  | 0.02 <sup>a</sup>   | 0.01 <sup>a</sup>   | 0.01 <sup>a</sup>   | 0.02 <sup>a</sup>  | 0.02 <sup>a</sup>   |
| phenylalanine     | 0.30 <sup>b</sup>  | 0.34 <sup>ab</sup>  | 0.32 <sup>ab</sup>  | 0.33 <sup>ab</sup>  | 0.34 <sup>ab</sup> | 0.34 <sup>a</sup>   |
| proline           | 0.52 <sup>b</sup>  | 0.63 <sup>a</sup>   | 0.58 <sup>ab</sup>  | 0.62 <sup>a</sup>   | 0.62 <sup>a</sup>  | 0.60 <sup>ab</sup>  |
| serine            | 0.17 <sup>b</sup>  | 0.20 <sup>a</sup>   | 0.19 <sup>ab</sup>  | 0.20 <sup>a</sup>   | 0.20 <sup>a</sup>  | 0.21 <sup>a</sup>   |
| threonine         | 0.05 <sup>a</sup>  | 0.06 <sup>a</sup>   | 0.06 <sup>a</sup>   | 0.06 <sup>a</sup>   | 0.05 <sup>a</sup>  | 0.05 <sup>a</sup>   |
| tryptophan        | 0.12 <sup>a</sup>  | 0.12 <sup>a</sup>   | 0.12 <sup>a</sup>   | 0.13 <sup>a</sup>   | 0.13 <sup>a</sup>  | 0.15 <sup>a</sup>   |
| tyrosine          | 0.13 <sup>c</sup>  | 0.19 <sup>bc</sup>  | 0.18 <sup>bc</sup>  | 0.21 <sup>ab</sup>  | 0.26 <sup>a</sup>  | 0.25 <sup>a</sup>   |
| valine            | 0.22 <sup>b</sup>  | 0.24 <sup>a</sup>   | 0.23 <sup>ab</sup>  | 0.24 <sup>a</sup>   | 0.23 <sup>ab</sup> | 0.23 <sup>ab</sup>  |
| TOAs, including:  | 1.11 <sup>a</sup>  | 1.06 <sup>a</sup>   | 1.09 <sup>a</sup>   | 1.11 <sup>a</sup>   | 1.11 <sup>a</sup>  | 1.05 <sup>a</sup>   |
| citric acid       | 0.65 <sup>a</sup>  | 0.60 <sup>a</sup>   | 0.62 <sup>a</sup>   | 0.68 <sup>a</sup>   | 0.71 <sup>a</sup>  | 0.64 <sup>a</sup>   |
| fumaric acid      | 0.01 <sup>a</sup>  | 0.01 <sup>a</sup>   | 0.01 <sup>a</sup>   | 0.01 <sup>a</sup>   | 0.01 <sup>a</sup>  | 0.01 <sup>a</sup>   |
| malic acid        | 0.10 <sup>b</sup>  | 0.12 <sup>ab</sup>  | 0.13 <sup>ab</sup>  | 0.11 <sup>ab</sup>  | 0.14 <sup>a</sup>  | 0.13 <sup>ab</sup>  |
| lactic acid       | 0.19 <sup>a</sup>  | 0.16 <sup>abc</sup> | 0.17 <sup>ab</sup>  | 0.16 <sup>bcd</sup> | 0.13 <sup>d</sup>  | 0.14 <sup>cd</sup>  |
| oxalic acid       | 0.15 <sup>ab</sup> | 0.15 <sup>a</sup>   | 0.15 <sup>ab</sup>  | 0.14 <sup>ab</sup>  | 0.11 <sup>b</sup>  | 0.12 <sup>b</sup>   |
| propionic acid    | 0.01 <sup>a</sup>  | 0.01 <sup>a</sup>   | 0.01 <sup>a</sup>   | 0.01 <sup>a</sup>   | 0.01 <sup>a</sup>  | 0.01 <sup>a</sup>   |
| TRCs, including:  | 0.68 <sup>b</sup>  | 0.88 <sup>a</sup>   | 0.78 <sup>ab</sup>  | 0.81 <sup>ab</sup>  | 0.80 <sup>ab</sup> | 0.80 <sup>ab</sup>  |
| phosphoric acid   | 0.65 <sup>b</sup>  | 0.86 <sup>a</sup>   | 0.75 <sup>ab</sup>  | 0.78 <sup>ab</sup>  | 0.77 <sup>ab</sup> | 0.78 <sup>ab</sup>  |
| urea              | 0.03 <sup>a</sup>  | 0.03 <sup>a</sup>   | 0.03 <sup>a</sup>   | 0.03 <sup>a</sup>   | 0.03 <sup>a</sup>  | 0.03 <sup>a</sup>   |
